# Supplementary material for: Optimizing methylene blue adsorption conditions on hydrothermally synthesized NaX zeolite through a full two-level factorial design
Source: Royal Society of Chemistry journal article supplement (doi:10.1039/d4ra04483e), 2024-01-01
Supplement: d4ra04483e1.pdf [file d4ra04483e1.pdf]

**Supplementary Data**

**Optimizing methylene blue adsorption conditions on hydrothermally synthesized NaX zeolite through a full two-level factorial design**

Hammoudi Hadda Aya<sup>1</sup>, Nibou Djamel<sup>1</sup>, Amokrane Samira<sup>1</sup>, Marta Otero<sup>2</sup>,

Moonis Ali Khan<sup>3</sup>, \*

<sup>1</sup>Laboratory of Materials Technology, University of Science and Technology Houari

Boumediene, B.P. 32, El-Alia, Bab-Ezzouar, Algiers, Algeria

<sup>2</sup>Departamento de Química y Física Aplicadas, Universidad de León, Campus de Vegazana s/n,  
24071 León, Spain

<sup>3</sup>Chemistry Department, College of Science, King Saud University, Riyadh 11451, Saudi Arabia

---

\*Corresponding author. Tel. , Fax :

E-mail address: [moonisalikhan@gmail.com](mailto:moonisalikhan@gmail.com); [mokhan@ksu.edu.sa](mailto:mokhan@ksu.edu.sa)

**Table S1.** Experimental ranges of factors levels.

| Factor                                | Coded factor | -1  | 1   |
|---------------------------------------|--------------|-----|-----|
| pH                                    | $x_1$        | 2   | 12  |
| Solid/liquid ratio (S/L)              | $x_2$        | 0.5 | 3.5 |
| Initial concentration ( $C_0$ , mg/L) | $x_3$        | 5   | 120 |
| Temperature (T, K)                    | $x_4$        | 298 | 333 |

**Table S2.** Elemental composition of NaX zeolite.

| Element | (%) mass | (%) atomic |
|---------|----------|------------|
| O       | 44.95    | 57.14      |
| Na      | 15.27    | 13.51      |
| Al      | 18.10    | 13.64      |
| Si      | 21.69    | 15.71      |
| Si/Al   | 1.198    | 1.152      |

**Table S3.** Non-linear and linear isotherm models used.

|                            | Nonlinear form                                                     | Linear form                                                 | Plot                           |
|----------------------------|--------------------------------------------------------------------|-------------------------------------------------------------|--------------------------------|
| Models with two-parameters |                                                                    |                                                             |                                |
| Langmuir-1                 | $q_e = \frac{q_m K_L C_e}{1 + K_L C_e}$                            | $\frac{C_e}{q_e} = \frac{1}{q_m} C_e + \frac{1}{q_m b}$     | $C_e/q_e$ vs $C_e$             |
| Freundlich                 | $q_e = K_F C_e^{1/n}$                                              | $\ln q_e = \ln K_F + \frac{1}{n} \ln C_e$                   | $\ln q_e$ vs $\ln C_e$         |
| Temkin                     | $q_e = \frac{RT}{B_T} \ln K_T C_e$                                 | $q_e = \frac{R}{B_T} T \ln K_T + \frac{R}{B_T} T \ln C_e$   | $q_e$ vs $\ln C_e$             |
| Elovich                    | $\frac{q_e}{q_{mE}} = K_E C_e \exp\left(\frac{q_e}{q_{mE}}\right)$ | $\ln \frac{q_e}{C_e} = \ln K_E q_{mE} - \frac{q_e}{q_{mE}}$ | $\ln \frac{q_e}{C_e}$ vs $q_e$ |

**Table S4.** Mathematical expression of error functions used

| Error function                      | Expression                                                                                                                                                   |
|-------------------------------------|--------------------------------------------------------------------------------------------------------------------------------------------------------------|
| Coefficient of determination, $R^2$ | $R^2 = \frac{\sum_{i=1}^n (q_{e.exp} - \overline{q_{e.cal}})_i^2}{\sum_{i=1}^n (q_{e.exp} - q_{e.cal})^2 + (\overline{q_{e.exp}} - \overline{q_{e.cal}})^2}$ |
| Adjusted R-Squared                  | $R_{adj}^2 = 1 - \frac{(1 - R^2) * (n - 1)}{n - k - 1}$                                                                                                      |
| Sum of squares errors, SSE:         | $SSE = \sum_{i=1}^n (q_{e.e} - \overline{q_{e.c}})_i^2$                                                                                                      |
| Reduced chi-square, $\chi^2$        | $\chi^2 = \frac{\sum_{i=1}^n (q_{e.e} - \overline{q_{e.c}})_i^2}{n - p}$                                                                                     |
| Mean Square Error, MSE              | $MSE = \frac{100}{n - 2} \sum_{i=1}^n (q_{e.e} - \overline{q_{e.c}})_i^2$                                                                                    |
| Root Mean Square Error, RMSE        | $RMSE = \sqrt{\frac{100}{n - 2} \sum_{i=1}^n (q_{e.e} - \overline{q_{e.c}})_i^2}$                                                                            |
| Akaike information criterion, AIC   | $AIC = 2p + n * \ln\left(\frac{SSE}{n}\right)$                                                                                                               |
| Corrected evaluation of AIC, AICc   | $AIC = 2p + n * \ln\left(\frac{SSE}{n}\right) + 2p * \frac{(p + 1)}{(n - p - 1)}$                                                                            |

**Table S5.** Separation factor ( $R_L$ ) for MB adsorption onto NaX zeolite.

| Concentration<br>C (mg/L) | 5    | 8    | 10   | 20   | 30   | 80   | 100  | 110  | 120  |
|---------------------------|------|------|------|------|------|------|------|------|------|
| $R_L = (1/(1+b*C))$       | 0.62 | 0.51 | 0.45 | 0.29 | 0.22 | 0.14 | 0.09 | 0.07 | 0.06 |

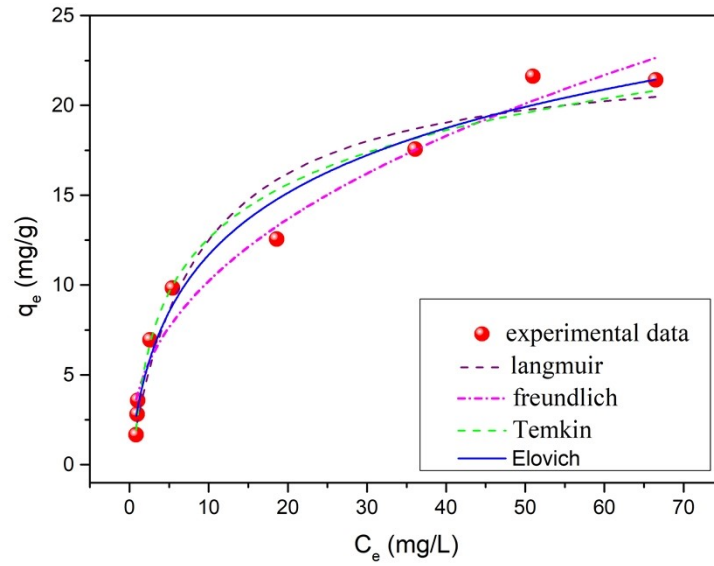

**Figure S1.** MB adsorption isotherms onto NaX using non-linear regression (pH = 2, S/L = 2.5 g/L, and T = 298 K)

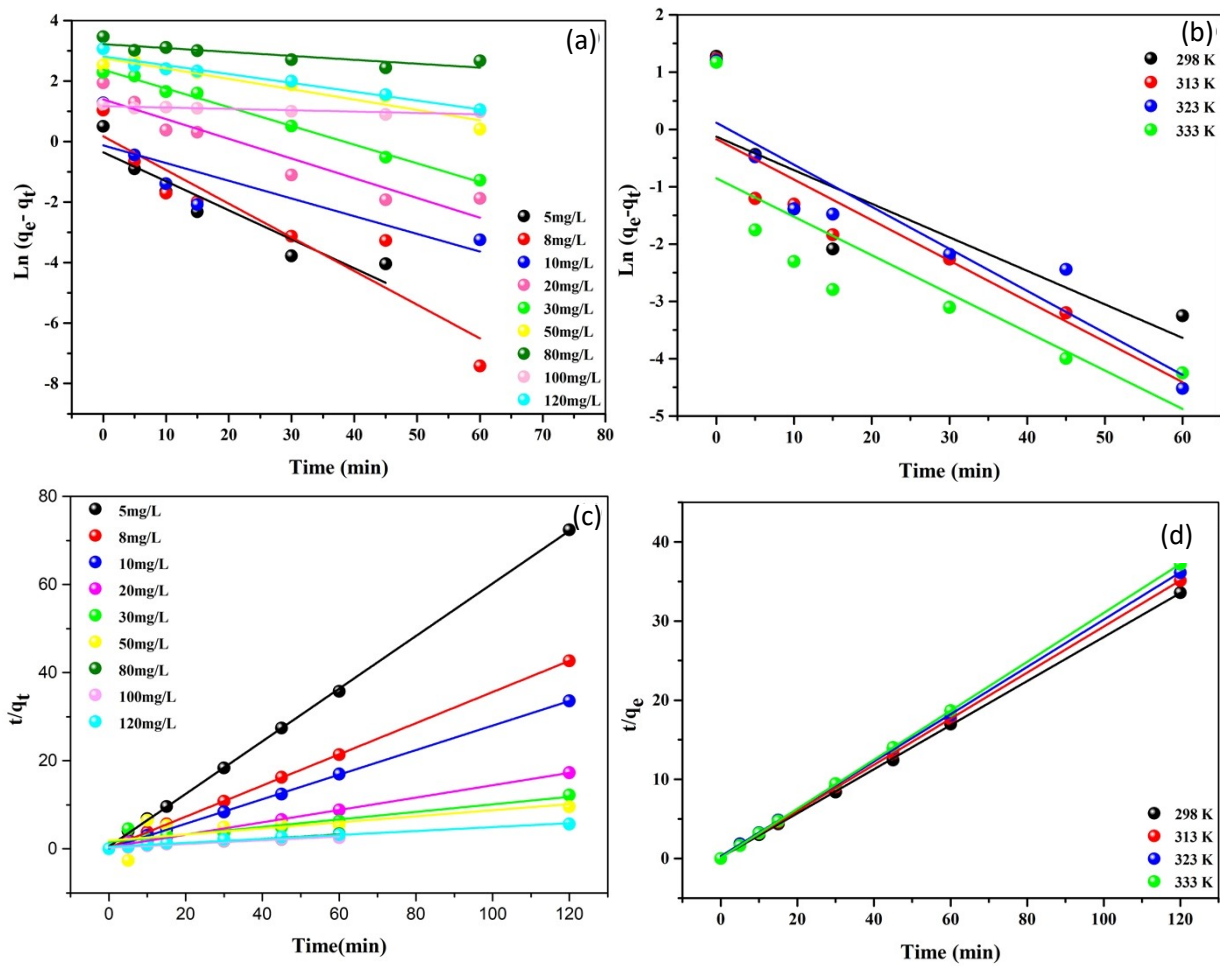

**Figure S2.** Pseudo-first-order kinetic models (a) at different concentrations, (b) at different temperatures, and pseudo-second-order kinetic models (c) at different concentrations, (d) at different temperatures for the MB adsorption onto the NaX zeolite.

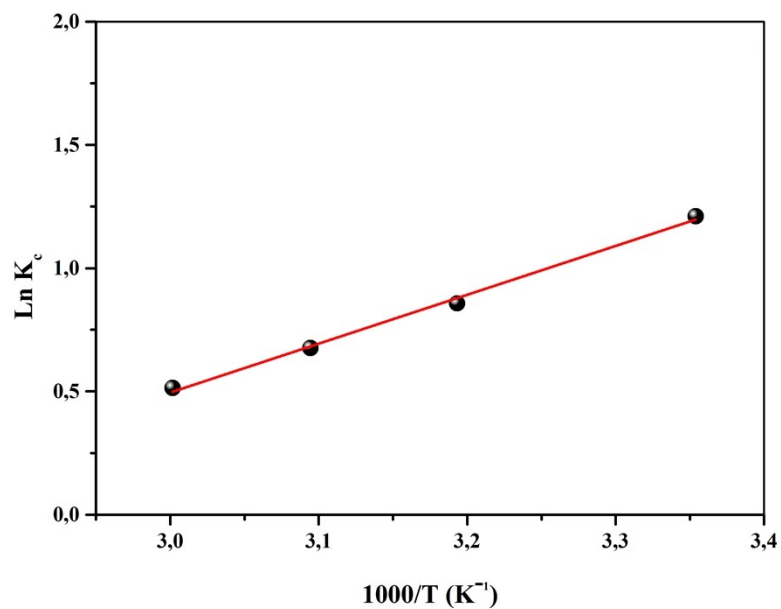

**Figure S3.** Plot of  $\text{Ln}K_c$  as a function of  $(1000/T)$

$(C_0 = 10 \text{ mg/L}, S/L = 2.5 \text{ g/L and pH} = 2)$
